# Supplementary material for: Rational synthesis and characterization of temperature switching ZnFe2O4/ZnO nanocomposites used for anti-bacterial, anti-oxidant and seed germination properties
Source: Royal Society of Chemistry journal article supplement (doi:10.1039/d3nj04160c), 2024-01-01
Supplement: d3nj04160c1.pdf [file d3nj04160c1.pdf]

# Rational Synthesis and Characterization of Temperature Switching ZnFe<sub>2</sub>O<sub>4</sub>/ZnO Nanocomposite Used for Anti-bacterial, Anti-oxidant and Seed Germination Properties

Shatarupa Basak<sup>a</sup>, Suranjan Sikdar<sup>b</sup>, Salim Ali<sup>a</sup>, Modhusudan Mondal<sup>a</sup>, Md Salman Haydar<sup>c</sup>, Kushankur Sarkar<sup>c</sup>, Monoranjan Chowdhury<sup>c</sup>, Mahendra Nath Roy<sup>a,d\*</sup>

<sup>a</sup>Department of Chemistry, University of North Bengal, Darjeeling-734013, West Bengal, India.

<sup>b</sup>Department of Chemistry, Ghani Khan Choudhury Institute of Engineering and Technology (GKCIET), Malda-732141, West Bengal, India.

<sup>c</sup>Department of Botany, University of North Bengal, Darjeeling-734013, West Bengal, India.

**\*Corresponding Author:**

Mahendra Nath Roy: [mahendraroy2002@yahoo.co.in](mailto:mahendraroy2002@yahoo.co.in), [vcapduniversity@gmail.com](mailto:vcapduniversity@gmail.com).

**Number of Pages: 05**

**Number of Tables: 07**

**Number of Figures: 01**

**Number of Equations: 05**

**Table S1:** Size and other lattice parameters of the IZ 1 nanocomposites

| <b>2θ (degree)</b> | <b>FWHM (degree)</b> | <b>Crystalline size (nm)</b> | <b>Average Crystalline size (nm)</b> | <b>Micro-strain (<math>\epsilon \times 10^{-3}</math>)</b> | <b>Dislocation Density (<math>\delta \times 10^{-3}</math>) (nm<sup>-2</sup>)</b> |
|--------------------|----------------------|------------------------------|--------------------------------------|------------------------------------------------------------|-----------------------------------------------------------------------------------|
| 12.2773            | 1.1003               | 7.178711934                  | 13.98634295                          | 4.773436                                                   | 19.40470064                                                                       |
| 14.1196            | 1.0747               | 7.336055375                  |                                      | 4.653711                                                   | 18.58124451                                                                       |
| 18.1113            | 0.9468               | 8.286090904                  |                                      | 4.079703                                                   | 14.56466879                                                                       |
| 19.058             | 0.40013              | 19.58031943                  |                                      | 1.721806                                                   | 2.608317499                                                                       |
| 28.1672            | 0.43342              | 17.77836104                  |                                      | 1.834307                                                   | 3.163854894                                                                       |
| 29.7281            | 0.82905              | 9.261746655                  |                                      | 3.496364                                                   | 11.65773572                                                                       |
| 32.1589            | 0.48456              | 15.75346077                  |                                      | 2.031578                                                   | 4.029471129                                                                       |
| 32.8242            | 0.47423              | 16.06940432                  |                                      | 1.984907                                                   | 3.872580407                                                                       |
| 35.0503            | 0.66908              | 11.32234375                  |                                      | 2.783907                                                   | 7.800587769                                                                       |
| 36.5344            | 0.4606               | 16.3785001                   |                                      | 1.908466                                                   | 3.727792624                                                                       |
| 42.6242            | 0.64052              | 11.55469741                  |                                      | 2.603672                                                   | 7.490017739                                                                       |
| 52.6034            | 0.64836              | 10.9843958                   |                                      | 2.536127                                                   | 8.287960135                                                                       |

|                |         |             |  |          |             |
|----------------|---------|-------------|--|----------|-------------|
| <b>56.3136</b> | 0.88369 | 7.926034979 |  | 3.399525 | 15.91798279 |
| <b>58.4374</b> | 0.43512 | 15.93463863 |  | 1.657001 | 3.938361363 |
| <b>61.8149</b> | 0.85138 | 8.006043214 |  | 3.187331 | 15.60142042 |
| <b>73.0479</b> | 0.36041 | 17.71342472 |  | 1.263742 | 3.187094408 |
| <b>85.5602</b> | 0.14168 | 41.15497229 |  | 0.453734 | 0.590412268 |
| <b>88.554</b>  | 0.59653 | 9.534971817 |  | 1.863573 | 10.99920186 |

**Table S2:** Size and other lattice parameters of the IZ 2 nanocomposites

| <b>2θ (degree)</b> | <b>FWHM (degree)</b> | <b>Crystalline size (nm)</b> | <b>Average Crystalline size (nm)</b> | <b>Micro-strain (<math>\epsilon \times 10^{-3}</math>)</b> | <b>Dislocation Density (<math>\delta \times 10^{-3}</math>) (nm<sup>-2</sup>)</b> |
|--------------------|----------------------|------------------------------|--------------------------------------|------------------------------------------------------------|-----------------------------------------------------------------------------------|
| <b>12.6272</b>     | 1.2794               | 6.17172577                   | 16.20837843                          | 5.548577                                                   | 26.25347273                                                                       |
| <b>18.1285</b>     | 0.76278              | 10.28485684                  |                                      | 3.286693                                                   | 9.45373661                                                                        |
| <b>19.0241</b>     | 0.16525              | 47.41338539                  |                                      | 0.711125                                                   | 0.444834097                                                                       |
| <b>28.0309</b>     | 0.90404              | 8.525940391                  |                                      | 3.827189                                                   | 13.75673642                                                                       |
| <b>29.8732</b>     | 0.58693              | 13.07798958                  |                                      | 2.474434                                                   | 5.846797146                                                                       |
| <b>31.7923</b>     | 0.85689              | 8.916543717                  |                                      | 3.595912                                                   | 12.57786455                                                                       |
| <b>32.7391</b>     | 0.25331              | 30.09063377                  |                                      | 1.06047                                                    | 1.1044278                                                                         |
| <b>32.9438</b>     | 0.4094               | 18.60832131                  |                                      | 1.713031                                                   | 2.887922985                                                                       |
| <b>35.1699</b>     | 0.71095              | 10.65201893                  |                                      | 2.957143                                                   | 8.813251045                                                                       |
| <b>38.6242</b>     | 0.17664              | 42.44380013                  |                                      | 0.727369                                                   | 0.555100321                                                                       |
| <b>42.7438</b>     | 0.64146              | 11.53306087                  |                                      | 2.60643                                                    | 7.518147326                                                                       |
| <b>52.9533</b>     | 0.64073              | 11.09837408                  |                                      | 2.502487                                                   | 8.118602576                                                                       |
| <b>56.51</b>       | 0.83035              | 8.427437162                  |                                      | 3.191393                                                   | 14.08020423                                                                       |
| <b>58.429</b>      | 0.41174              | 16.84015207                  |                                      | 1.56803                                                    | 3.526208454                                                                       |
| <b>59.6316</b>     | 0.62739              | 10.98629331                  |                                      | 2.375137                                                   | 8.285097454                                                                       |
| <b>61.9601</b>     | 0.78492              | 8.677328935                  |                                      | 2.936292                                                   | 13.28091137                                                                       |
| <b>67.8964</b>     | 1.46933              | 4.485124285                  |                                      | 5.318333                                                   | 49.71083247                                                                       |
| <b>73.3466</b>     | 0.64689              | 9.849818663                  |                                      | 2.26387                                                    | 10.30726709                                                                       |
| <b>85.731</b>      | 0.14571              | 39.96148321                  |                                      | 0.465997                                                   | 0.626205391                                                                       |
| <b>88.8783</b>     | 0.92633              | 6.123280201                  |                                      | 2.885878                                                   | 26.67053537                                                                       |

**Table S3:** Size and other lattice parameters of the IZ 3 nanocomposites

| <b>2θ (degree)</b> | <b>FWHM (degree)</b> | <b>Crystalline size (nm)</b> | <b>Average Crystalline size (nm)</b> | <b>Micro-strain (<math>\epsilon \times 10^{-3}</math>)</b> | <b>Dislocation Density (<math>\delta \times 10^{-3}</math>) (nm<sup>-2</sup>)</b> |
|--------------------|----------------------|------------------------------|--------------------------------------|------------------------------------------------------------|-----------------------------------------------------------------------------------|
| <b>12.2434</b>     | 0.8444               | 9.35455674                   | 17.97674481                          | 3.66338                                                    | 11.42756165                                                                       |
| <b>14.0601</b>     | 0.9979               | 7.901157057                  |                                      | 4.321426                                                   | 16.01838068                                                                       |
| <b>18.1285</b>     | 0.46987              | 16.69628429                  |                                      | 2.024592                                                   | 3.587239212                                                                       |
| <b>21.2502</b>     | 0.3152               | 24.77183234                  |                                      | 1.351739                                                   | 1.629610206                                                                       |
| <b>22.6064</b>     | 0.17526              | 44.44938552                  |                                      | 0.749883                                                   | 0.506137455                                                                       |
| <b>28.0309</b>     | 0.33031              | 23.3350221                   |                                      | 1.398344                                                   | 1.836468852                                                                       |

|                |         |             |          |             |
|----------------|---------|-------------|----------|-------------|
| <b>29.9244</b> | 0.38445 | 19.96345106 | 1.620607 | 2.509162342 |
| <b>31.7667</b> | 0.41659 | 18.34173421 | 1.748318 | 2.972481828 |
| <b>32.7646</b> | 0.30379 | 25.08891017 | 1.271719 | 1.588679923 |
| <b>34.4278</b> | 0.49569 | 15.30883669 | 2.065974 | 4.266930999 |
| <b>35.1955</b> | 0.40734 | 18.59016172 | 1.69418  | 2.893567811 |
| <b>36.2446</b> | 0.53141 | 14.20788187 | 2.203693 | 4.953832578 |
| <b>36.8843</b> | 0.40784 | 18.47856634 | 1.688147 | 2.928622894 |
| <b>42.7694</b> | 0.43992 | 16.81521703 | 1.787361 | 3.536674132 |
| <b>47.6311</b> | 0.54146 | 13.42266039 | 2.161393 | 5.550380996 |
| <b>53.158</b>  | 0.44254 | 16.05441984 | 1.726879 | 3.879812766 |
| <b>56.5611</b> | 0.50278 | 13.91472352 | 1.931937 | 5.164768225 |
| <b>62.1648</b> | 0.54677 | 12.44342845 | 2.043204 | 6.458324913 |
| <b>68.0244</b> | 0.32155 | 20.47945268 | 1.162995 | 2.384313228 |
| <b>68.8176</b> | 0.86402 | 7.585762683 | 3.110349 | 17.37806816 |
| <b>70.5831</b> | 0.21663 | 29.93264946 | 0.771516 | 1.116116891 |
| <b>73.5769</b> | 0.47871 | 13.29030229 | 1.672793 | 5.661483962 |
| <b>74.3957</b> | 0.22383 | 28.27165307 | 0.777947 | 1.251116047 |
| <b>86.0125</b> | 0.54737 | 10.61346828 | 1.746553 | 8.877390983 |
| <b>89.1086</b> | 0.5601  | 10.10710244 | 1.741487 | 9.789187901 |

**Table S4:** Size and other lattice parameters of the IZ 4 nanocomposites

| <b>2θ (degree)</b> | <b>FWHM (degree)</b> | <b>Crystalline size (nm)</b> | <b>Average Crystalline size (nm)</b> | <b>Micro-strain (<math>\epsilon \times 10^{-3}</math>)</b> | <b>Dislocation Density (<math>\delta \times 10^{-3}</math>) (nm<sup>-2</sup>)</b> |
|--------------------|----------------------|------------------------------|--------------------------------------|------------------------------------------------------------|-----------------------------------------------------------------------------------|
| <b>15.0324</b>     | 0.9467               | 8.319458135                  | 26.2305043                           | 4.095266                                                   | 14.44807271                                                                       |
| <b>18.2309</b>     | 0.40053              | 19.58395517                  |                                      | 1.725571                                                   | 2.607349126                                                                       |
| <b>19.0753</b>     | 0.16694              | 46.92988244                  |                                      | 0.718344                                                   | 0.454047269                                                                       |
| <b>21.2758</b>     | 0.17873              | 43.68463114                  |                                      | 0.766454                                                   | 0.524013715                                                                       |
| <b>22.5808</b>     | 0.16235              | 47.98612238                  |                                      | 0.694676                                                   | 0.434278856                                                                       |
| <b>25.1395</b>     | 0.67965              | 11.40863486                  |                                      | 2.894454                                                   | 7.683031945                                                                       |
| <b>26.163</b>      | 0.51522              | 15.01907448                  |                                      | 2.189732                                                   | 4.433162571                                                                       |
| <b>28.0309</b>     | 0.21198              | 36.36093571                  |                                      | 0.897402                                                   | 0.756362343                                                                       |
| <b>29.0289</b>     | 0.22317              | 34.46136474                  |                                      | 0.942685                                                   | 0.842044523                                                                       |
| <b>29.95</b>       | 0.29591              | 25.93521799                  |                                      | 1.247302                                                   | 1.486689228                                                                       |
| <b>31.7923</b>     | 0.23907              | 31.95924685                  |                                      | 1.00325                                                    | 0.979054634                                                                       |
| <b>32.125</b>      | 0.20082              | 38.01487674                  |                                      | 0.842034                                                   | 0.691978859                                                                       |
| <b>32.7902</b>     | 0.27352              | 27.86362702                  |                                      | 1.144928                                                   | 1.288026219                                                                       |
| <b>34.479</b>      | 0.44967              | 16.87323159                  |                                      | 1.873909                                                   | 3.51239593                                                                        |
| <b>35.2211</b>     | 0.33149              | 22.84225682                  |                                      | 1.378613                                                   | 1.916558058                                                                       |
| <b>36.2446</b>     | 0.28652              | 26.35142575                  |                                      | 1.188164                                                   | 1.440097063                                                                       |
| <b>36.8075</b>     | 0.31184              | 24.17259215                  |                                      | 1.291068                                                   | 1.711407974                                                                       |
| <b>38.5986</b>     | 0.28979              | 25.87342423                  |                                      | 1.193392                                                   | 1.493799058                                                                       |
| <b>42.8462</b>     | 0.33968              | 21.77168871                  |                                      | 1.379731                                                   | 2.109676026                                                                       |
| <b>47.6055</b>     | 0.34695              | 20.94984913                  |                                      | 1.385087                                                   | 2.278443168                                                                       |

|         |         |             |          |             |
|---------|---------|-------------|----------|-------------|
| 48.7569 | 0.15538 | 46.56949441 | 0.617524 | 0.461101945 |
| 53.0556 | 0.38945 | 18.25111432 | 1.52039  | 3.002072865 |
| 56.6379 | 0.4269  | 16.38210475 | 1.639775 | 3.726152306 |
| 58.429  | 0.24443 | 28.36707528 | 0.930863 | 1.242713103 |
| 59.4781 | 0.35448 | 19.45942102 | 1.342999 | 2.640828334 |
| 62.1904 | 0.45668 | 14.89615692 | 1.70632  | 4.506626051 |
| 62.8557 | 0.46991 | 14.42582949 | 1.749575 | 4.805276816 |
| 66.3356 | 0.2814  | 23.63163175 | 1.02779  | 1.790657719 |
| 67.922  | 0.45033 | 14.63179533 | 1.629753 | 4.67094512  |
| 69.1247 | 0.63959 | 10.22873423 | 2.298199 | 9.557761982 |
| 70.6087 | 0.45993 | 14.09624147 | 1.637756 | 5.032610724 |
| 73.5257 | 0.49059 | 12.97279941 | 1.714879 | 5.941999269 |
| 74.5492 | 0.2648  | 23.87312987 | 0.919407 | 1.754612741 |
| 77.1848 | 0.10967 | 56.61787064 | 0.374017 | 0.311955708 |
| 78.3874 | 0.06675 | 92.23872719 | 0.225724 | 0.117536674 |
| 81.5602 | 0.27236 | 22.08690728 | 0.899879 | 2.049888239 |
| 86.0892 | 0.49248 | 11.78903907 | 1.570428 | 7.195205235 |
| 89.0574 | 0.57325 | 9.879594973 | 1.783157 | 10.24523015 |

**Table S5:** Antibacterial efficacy of various concentrations of IZ 3 against different gram-positive and negative bacteria. Results are presented as mean  $\pm$  standard deviation

| Tested concentrations of IZ 3 | Zone of Inhibition (in mm) against studied microorganism |                      |                    |                       |                    |
|-------------------------------|----------------------------------------------------------|----------------------|--------------------|-----------------------|--------------------|
|                               | <i>B. subtilis</i>                                       | <i>B. megaterium</i> | <i>S. flexneri</i> | <i>S. typhimurium</i> | <i>E. coli</i>     |
| 300 $\mu\text{g/mL}$          | 21.667 $\pm$ 0.577                                       | 12.667 $\pm$ 1.528   | 19.667 $\pm$ 0.577 | 11.333 $\pm$ 1.155    | 22.333 $\pm$ 0.577 |
| 200 $\mu\text{g/mL}$          | 13 $\pm$ 1                                               | 8 $\pm$ 1            | 16.667 $\pm$ 1.155 | 5.333 $\pm$ 0.577     | 18.667 $\pm$ 1.155 |
| 100 $\mu\text{g/mL}$          | 8.333 $\pm$ 0.577                                        | 0                    | 9.667 $\pm$ 0.577  | 0                     | 10 $\pm$ 1         |

**Table S6:** Antioxidant activity of different grade  $\text{ZnFe}_2\text{O}_4/\text{ZnO}$  nanocomposites. Data are presented as mean  $\pm$  standard deviation (n=3). Different letters (a, b, c, etc.) represented that they are statistically different at  $p \leq 0.05$  following Tukey's HSD test.

| Sample Name | Antioxidant activity (IC 50 Value in $\mu\text{g/mL}$ ) |                                 |                                 |                                 |
|-------------|---------------------------------------------------------|---------------------------------|---------------------------------|---------------------------------|
|             | ABTS                                                    | DPPH                            | SUPEROXIDE                      | NITRIC OXIDE                    |
| IZ 1        | 34.245 $\pm$ 0.279 <sup>a</sup>                         | 40.756 $\pm$ 0.721 <sup>a</sup> | 65.327 $\pm$ 1.742 <sup>a</sup> | 70.128 $\pm$ 4.214 <sup>a</sup> |
| IZ 2        | 34.974 $\pm$ 0.579 <sup>a</sup>                         | 40.997 $\pm$ 1.586 <sup>a</sup> | 71.137 $\pm$ 2.147 <sup>b</sup> | 74.456 $\pm$ 5.124 <sup>a</sup> |
| IZ 3        | 59.341 $\pm$ 1.987 <sup>b</sup>                         | 48.121 $\pm$ 0.629 <sup>b</sup> | 73.721 $\pm$ 2.245 <sup>b</sup> | 75.321 $\pm$ 5.187 <sup>a</sup> |

|      |                            |                           |                           |                             |
|------|----------------------------|---------------------------|---------------------------|-----------------------------|
| IZ 4 | 64.297 ±1.734 <sup>c</sup> | 55.817±2.421 <sup>c</sup> | 79.321±3.141 <sup>c</sup> | 133.217±10.427 <sup>b</sup> |
|------|----------------------------|---------------------------|---------------------------|-----------------------------|

**Table S7:** Various biochemical attributes of treated and control wheat seedlings. Results were presented as mean ± standard deviation, whereas the ‘\*’ symbol indicated that they are statistically significant from their respective control at 95% confidence level as observed through two-tailed t-test

| Treatments | Chlorophyll (mg/g FWT) | Protein (µg/mg FWT) | Sugar (µg/mg FWT) | Phenol (µg/mg FWT) |
|------------|------------------------|---------------------|-------------------|--------------------|
| IZ 1       | 3.040 ±0.089*          | 15.74 ±0.531*       | 12.489 ±0.531*    | 0.923 ±0.045       |
| Con        | 2.453 ±0.067           | 11.56 ±0.166        | 9.633 ±0.273      | 0.893 ±0.035       |

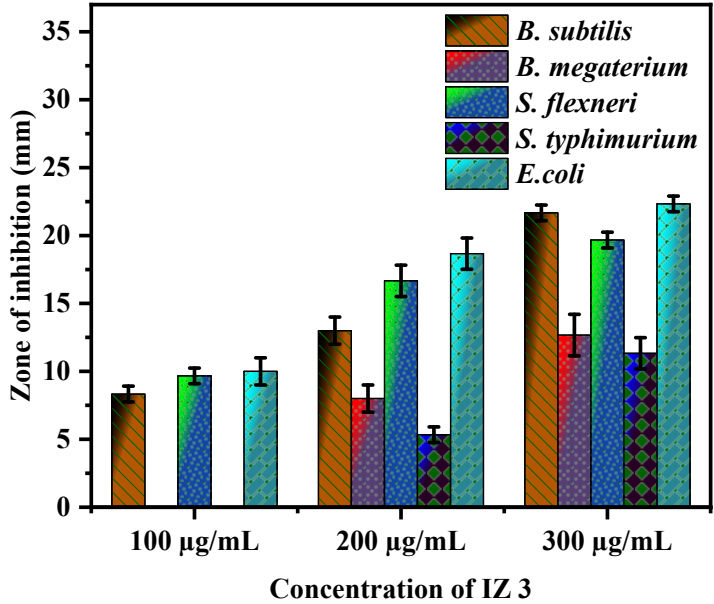

**Figure S1** Zone of inhibition (mm) IZ 3 against different bacterial strain at different concentration.

**Equations:**

$$\text{Inhibition Percentage} = \frac{A_c - A_s}{A_c} \times 100\% \quad (\text{S1})$$

Where,  $A_c$  and  $A_s$  are the absorbance of control and sample respectively.

$$D = \frac{0.9\lambda}{\beta \cos\theta} \quad (\text{S2})$$

Where, D is the average crystallite size,  $\theta$  is the angle of diffraction,  $\beta$  is the full width at half maximum intensity and  $\lambda$  is the wavelength of the radiation (1.54 Å).

$$\text{Crystallinity} = \frac{\text{area of the crystalline peaks}}{\text{area of all peaks (crystalline + amorphous)}} \times 100 \quad (\text{S3})$$

$$\varepsilon = \frac{\beta \cos\theta}{4} \quad (\text{S4})$$

$$\delta = \frac{1}{D^2} \quad (\text{S5})$$

Where,  $\varepsilon$  is the micro-strain and  $\delta$  is the dislocation density.
